# Supplementary material
Source: Springer Nature journal article supplement (https://www.springermedizin.de/resource/supplementary/12967_2010_740_MOESM5_ESM.pdf/9577404)

A

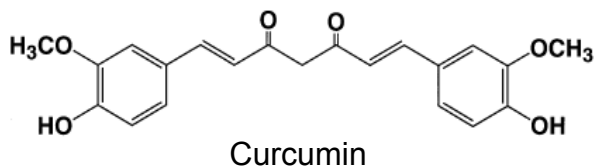

B

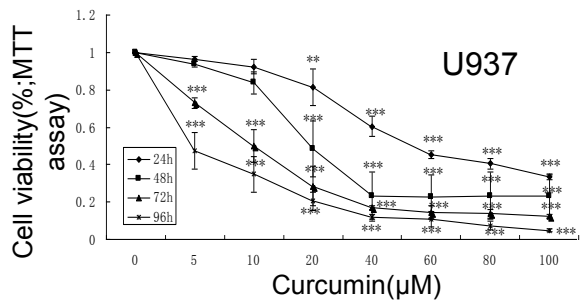

C

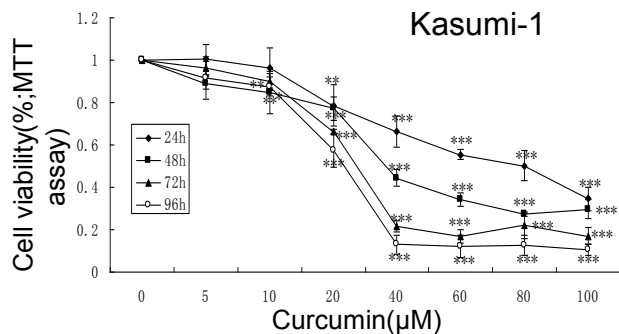

D

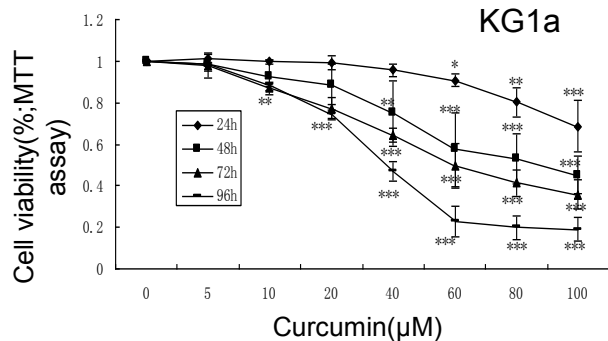

E

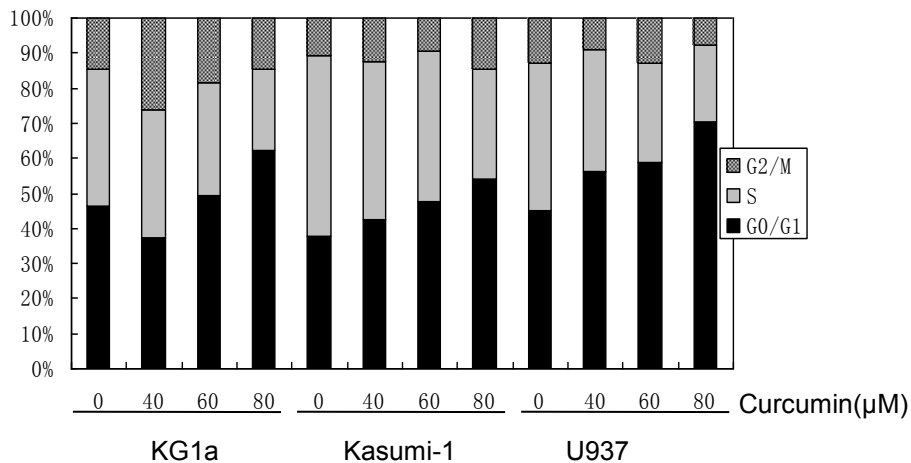

Supplement: MOESM5 [file 9577404]
